# Supplementary material
Source: ML conference proceedings conference paper supplement (https://openreview.net/forum?id=JbcwfmYrob)

Memory (Avg.)

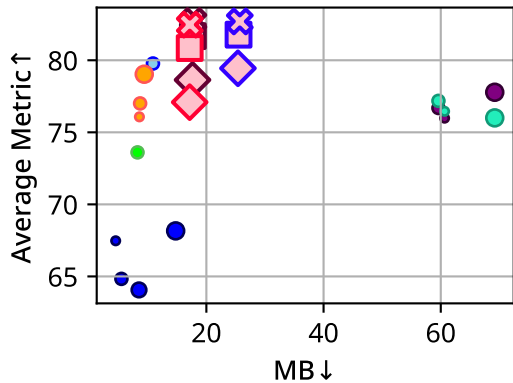

Memory (MRPC)

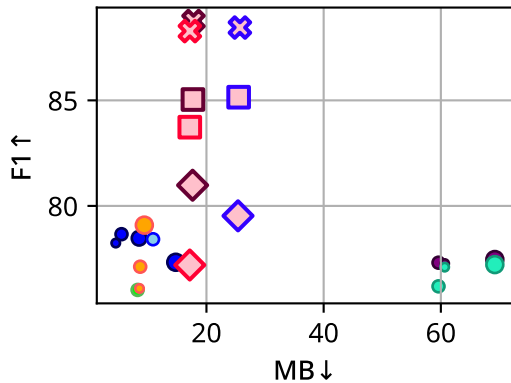

Memory (CoLA)

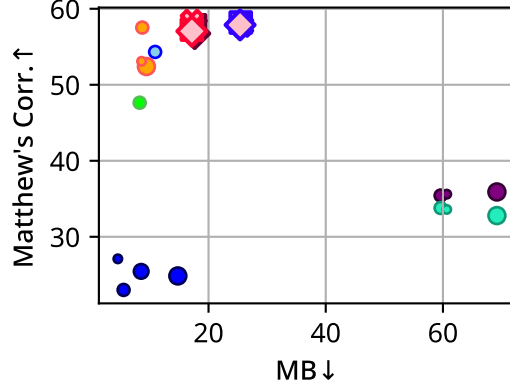

Memory (MNLI)

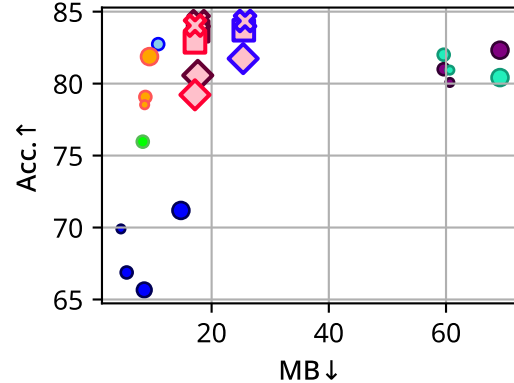

Latency (Avg.)

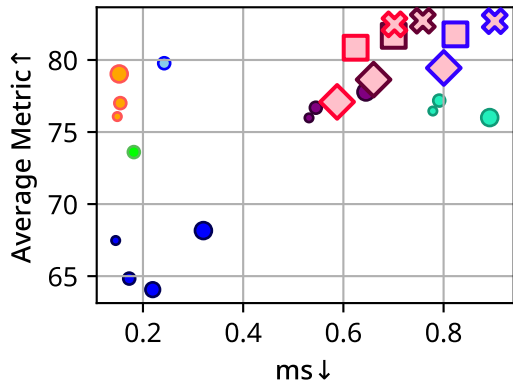

Latency (MRPC)

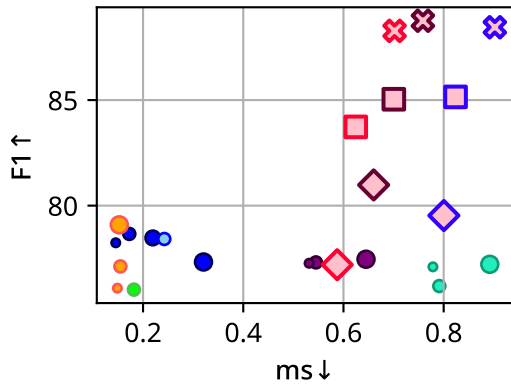

Latency (CoLA)

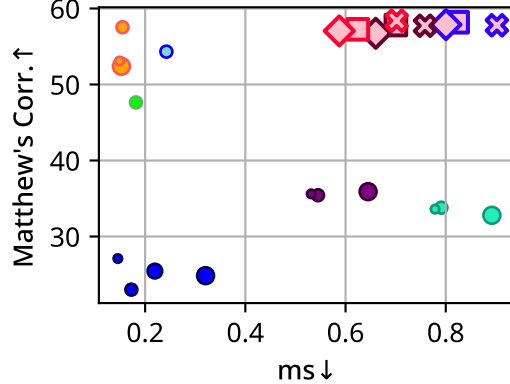

Latency (MNLI)

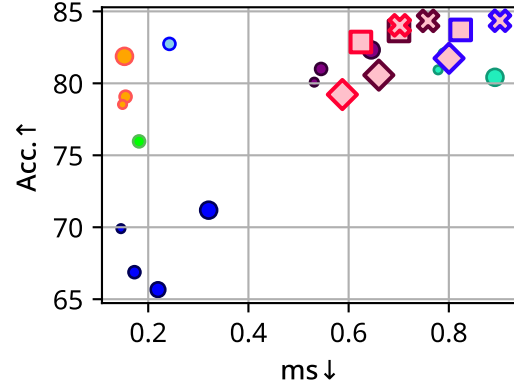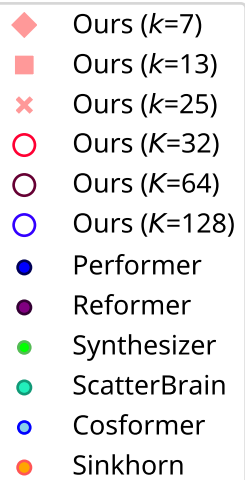

Supplement: supplementary_material [file attachment]
