# Supplementary material
Source: ML conference proceedings conference paper supplement (https://openreview.net/forum?id=JbcwfmYrob)

# Comparison of Trade-off Between Computational Cost and Accuracy

Memory / CoLA

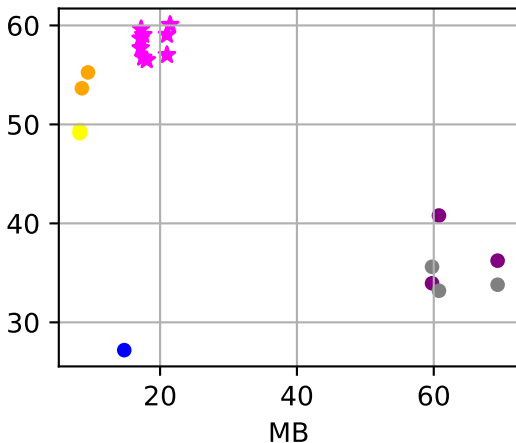

Memory / MRPC

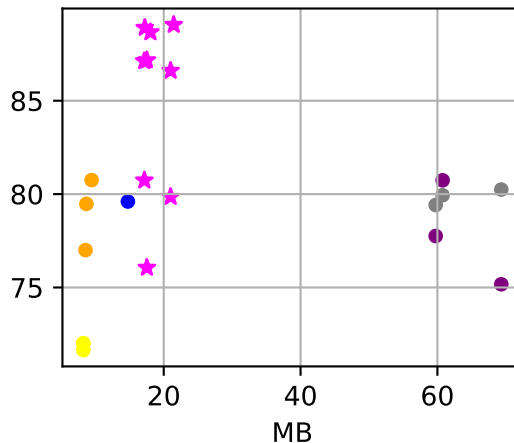

Memory / MNLI

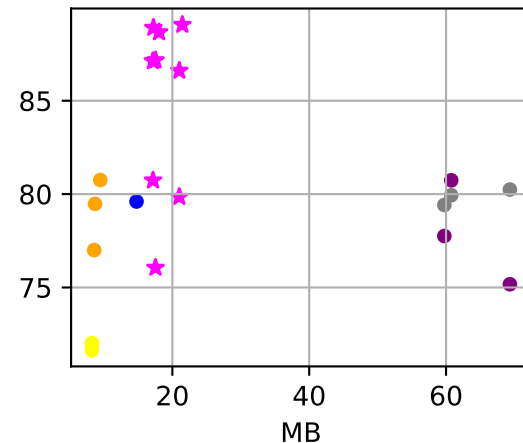

Latency / CoLA

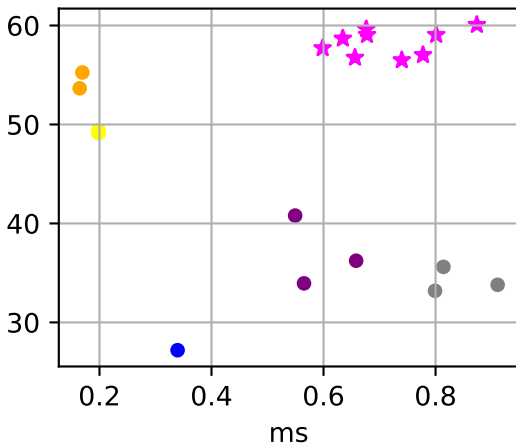

Latency / MRPC

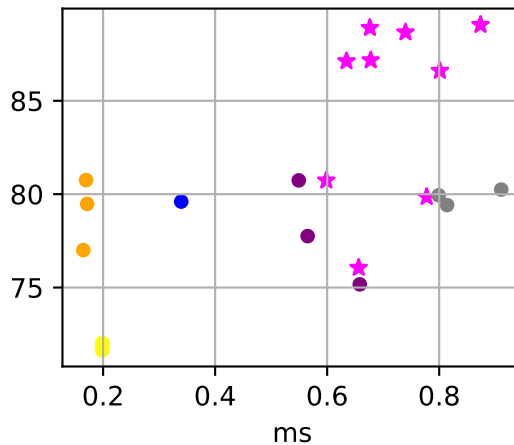

Latency / MNLI

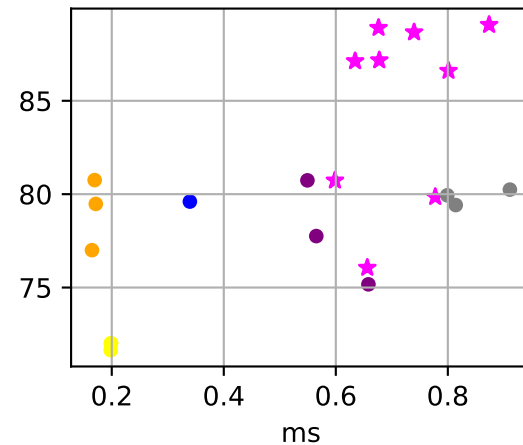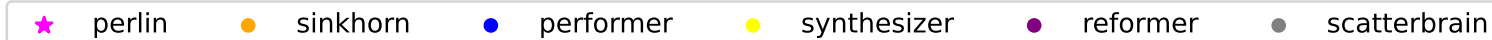

Supplement: supplementary_material [file attachment]
