# Supplementary material
Source: ML conference proceedings conference paper supplement (https://openreview.net/forum?id=JbcwfmYrob)

Peak VRAM Usage

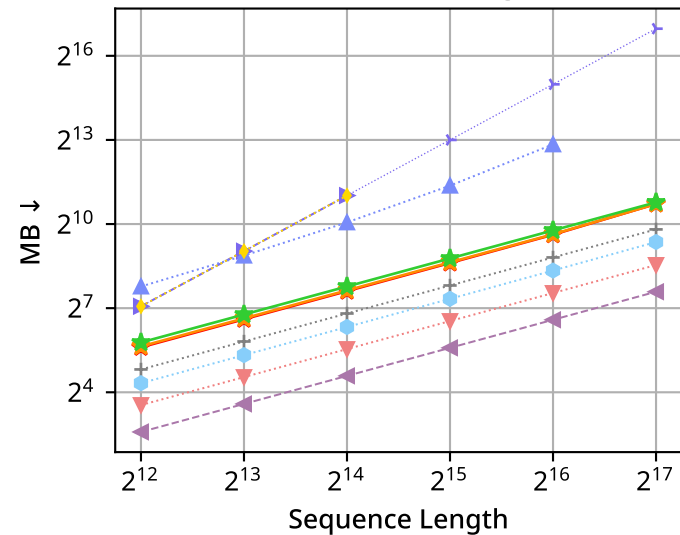

Latency

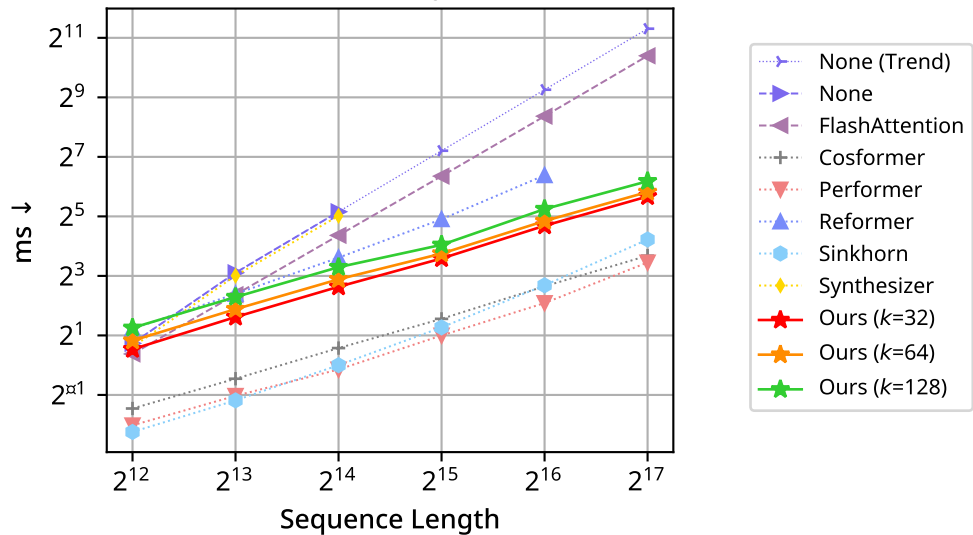

Supplement: supplementary_material [file attachment]

# Accuracy After Adjusting $k$

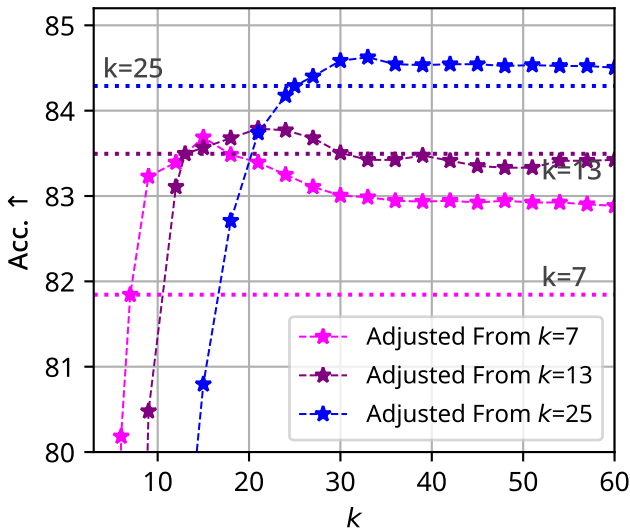

Supplement: supplementary_material [file attachment]

Memory

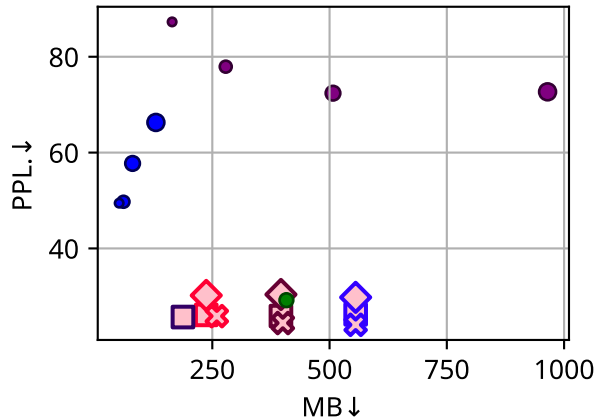

Latency

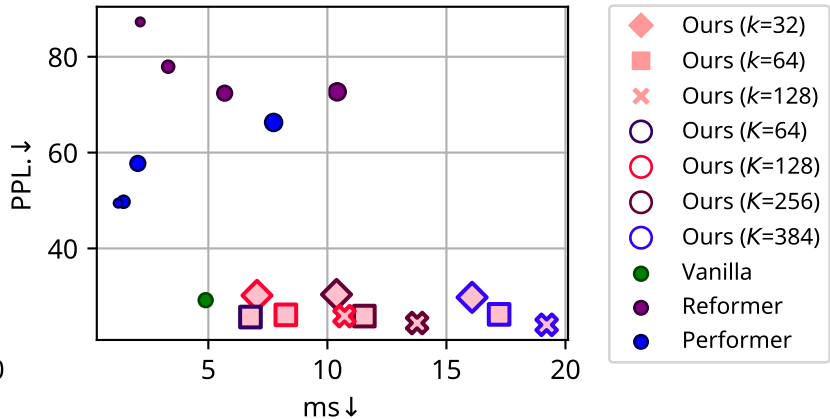

Supplement: supplementary_material [file attachment]

# Latency

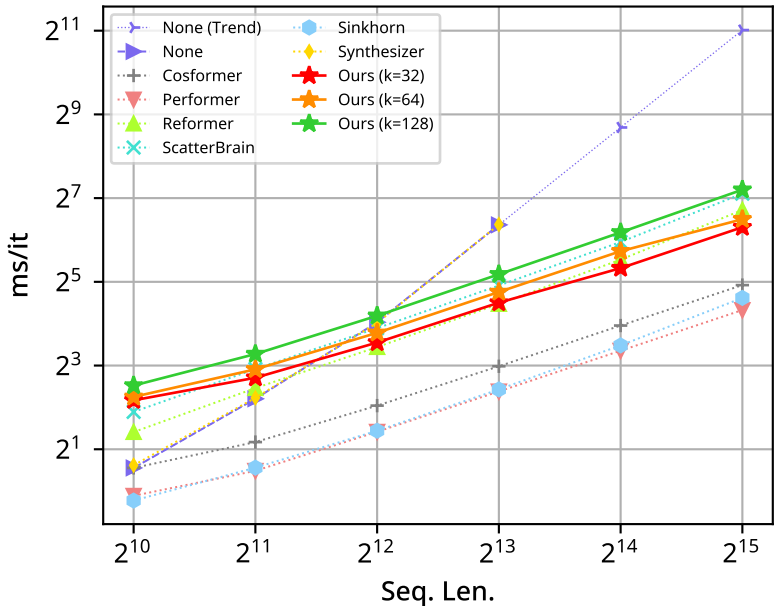

Supplement: supplementary_material [file attachment]

# Validation Curve

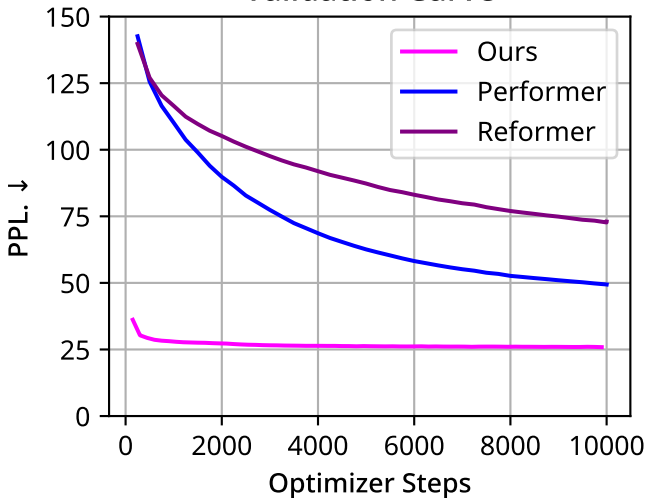

Supplement: supplementary_material [file attachment]

# Perplexity After Adjusting $k$

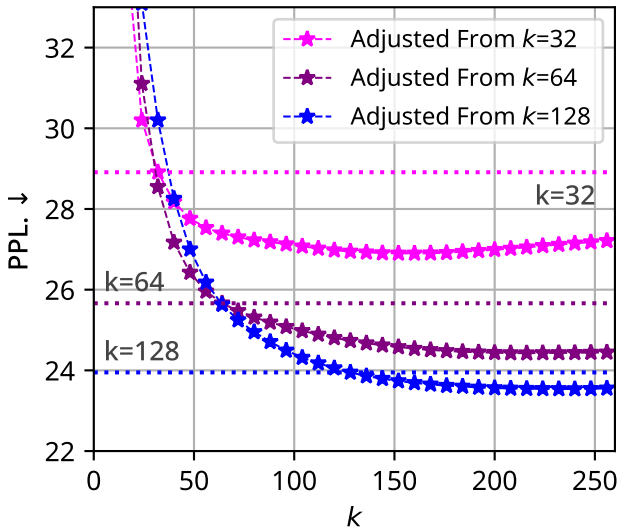

Supplement: supplementary_material [file attachment]

# Peak VRAM Usage

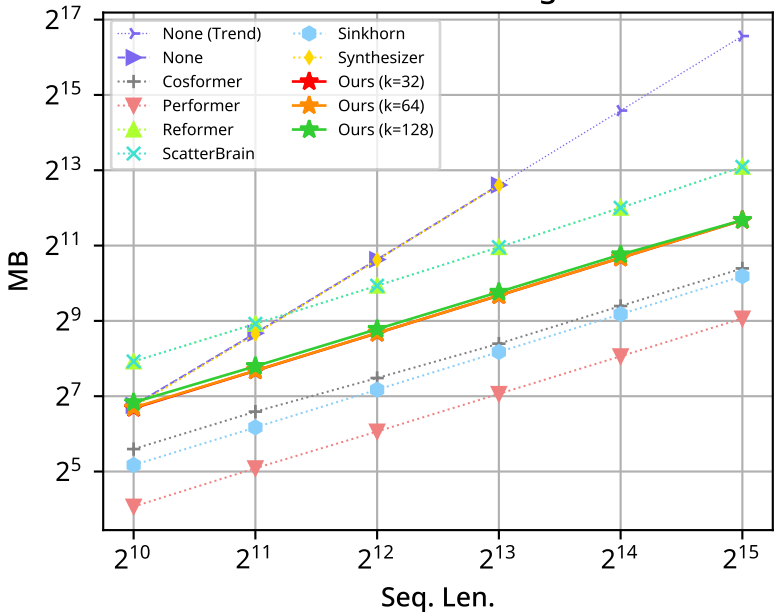

Supplement: supplementary_material [file attachment]

# Comparison of Trade-off Between Computational Cost and Accuracy

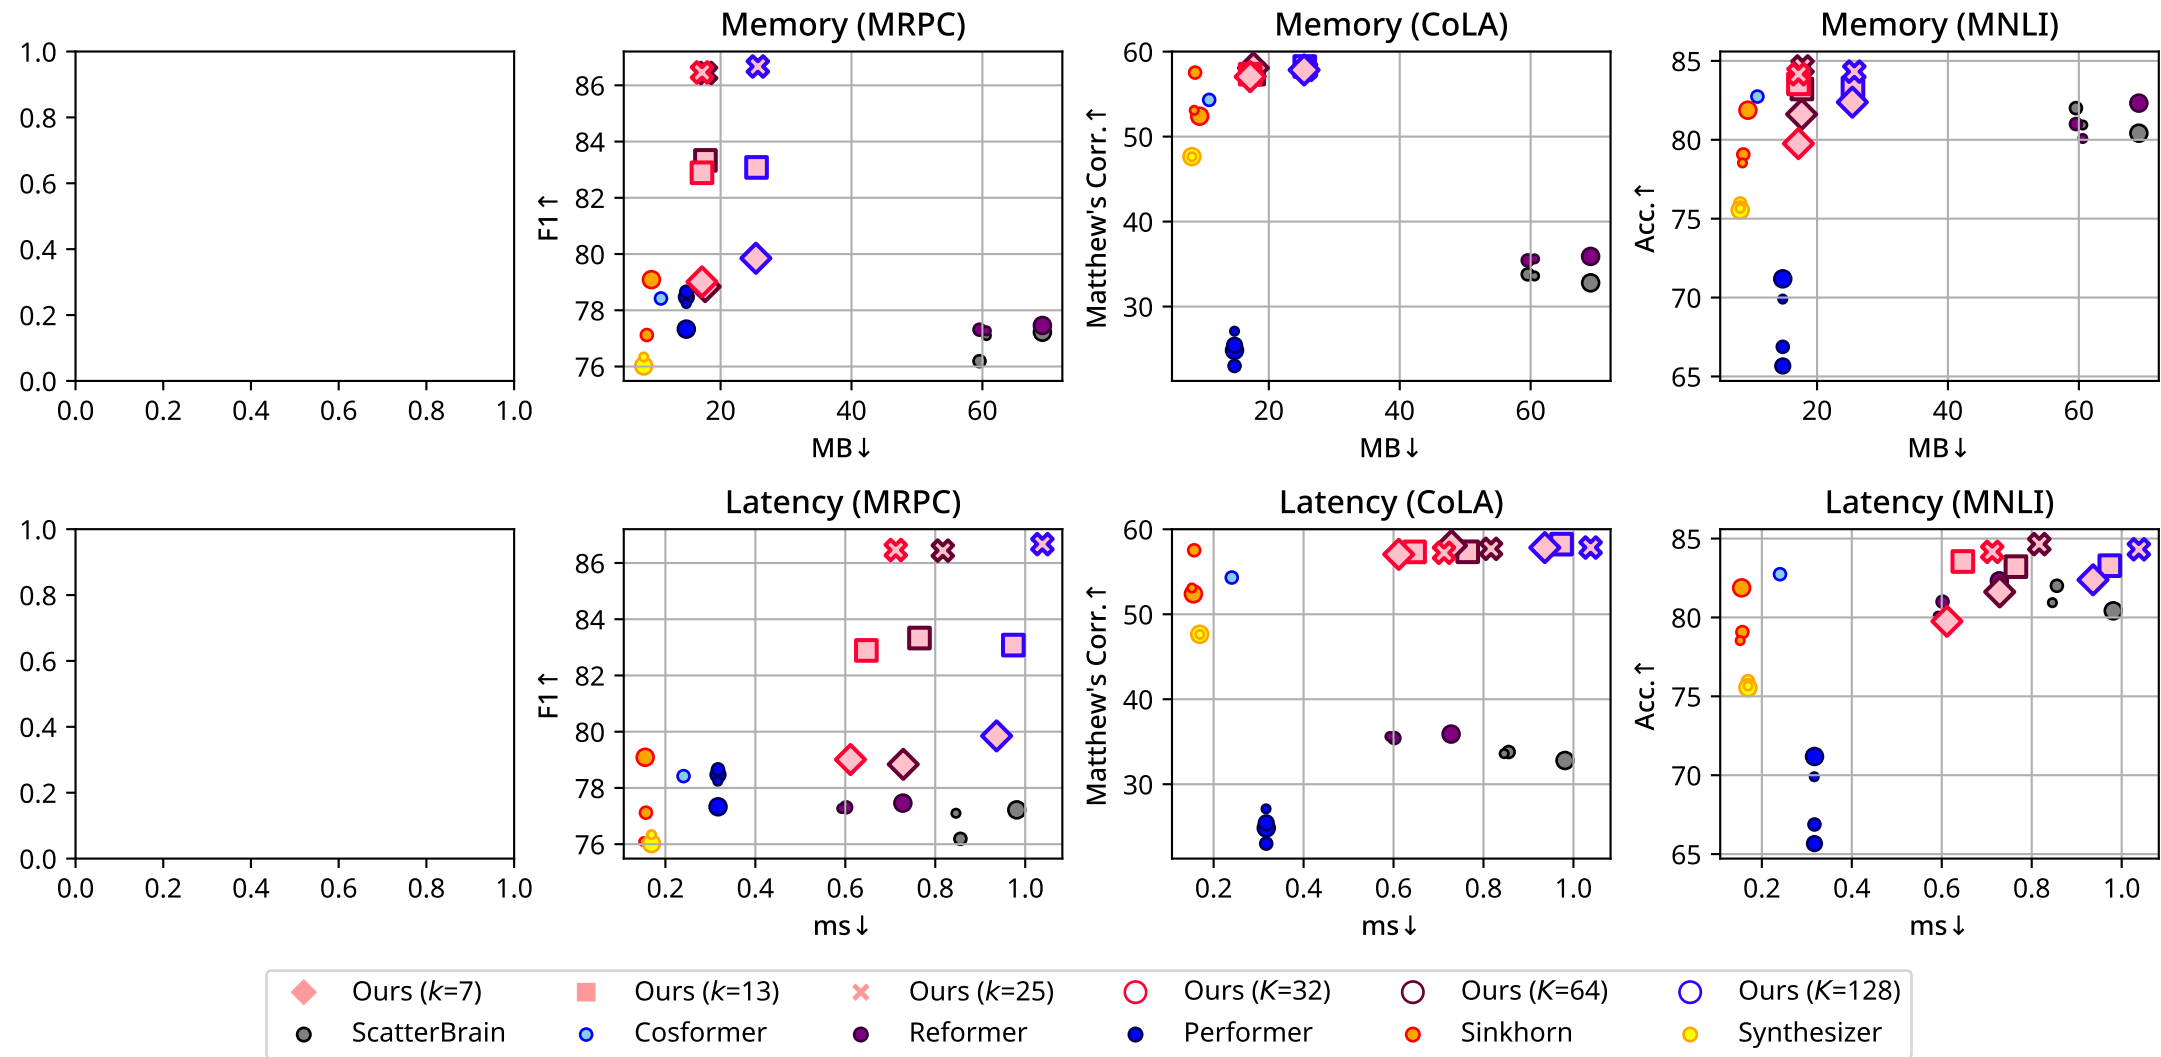

Supplement: supplementary_material [file attachment]
